# Supplementary material
Source: publisher site journal article supplement (https://www.spandidos-publications.com/301/downloadSupplementary)

Figure S1. Biochemical recurrence-free survival rates of NS or non-NS robot-assisted radical prostatectomy cases. NS, nerve sparing.

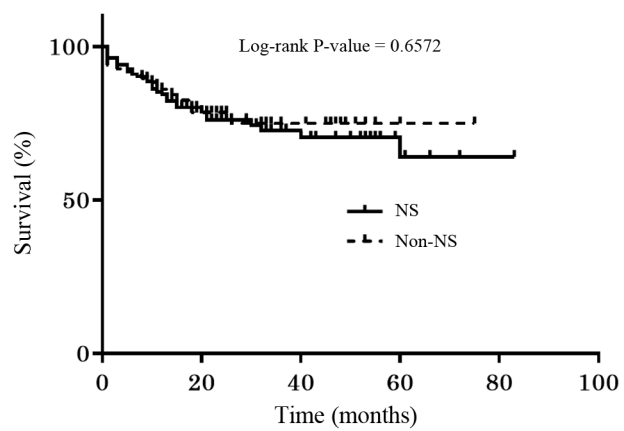

Figure S2. Biochemical recurrence-free survival rates of NHT (+) or NHT (-) robot-assisted radical prostatectomy cases. NHT, neoadjuvant hormonal therapy.

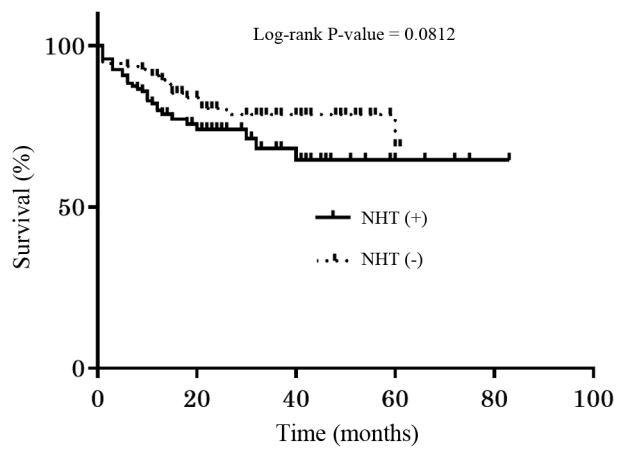

Supplement: Supplementary file 1 [file downloadSupplementary]
